# Supplementary material
Source: PubMed Central journal article supplement (PMC3203131)
Supplement: supp_ntr092_Web_Appendix_1.pdf [file supp_ntr092_Web_Appendix_1.pdf]

## Web Appendix 1

### Association of Alcohol Consumption with Weight in Population Studies

Cross sectional studies have shown inconsistent results, although this has been explained in part by gender effects, smoking status and drinking patterns. Lower alcohol intake has been associated with greater BMI in women, but less so, or with the opposite effect, in men [Hellerstedt et al, 1990, Colditz et al, 1991, Breslow & Smothers, 2005]. This effect in men is not consistently seen among male smokers [Mannisto et al, 1996, Cooke & Frost, 1982]. More frequent drinking has been associated with lower BMI independent of total alcohol consumption [Tolstrup et al 2005, Mannisto et al, 1996, Tolstrup et al, 2008].

Prospective studies have demonstrated increasing alcohol consumption over time is not associated with an increase in waist circumference [Tolstrup et al, 2008], but it is associated with weight gain [Gordon & Kannel, 1983], particularly in men [Gordon et al, 1986, Wannamethee & Shaper, 2003]. These studies have not investigated whether the effect is modified by smoking status. Prospective studies in women have found a U shaped curve [Wannamethee et al, 2004] and a significant inverse relationship with weight gain which was not modified by smoking status [Wang et al, 2010].

Three prospective studies (in males and females) have considered the association between alcohol and weight gain around the time of quitting smoking. These three studies found an inverse effect of alcohol consumption and weight gain. One study was a cohort of never-smokers, ex-smokers, current smokers and those who quit during the 2 -4 years follow-up. Cessation of smoking during follow up was positively related to an increase in BMI, whereas alcohol consumption was negatively associated with gain in BMI. There was no evidence of effect modification by smoking status. However smoking status was self reported and quitting date was variable (any time after study entry), so a smaller weight gain may have diluted the results. That study may also have lacked power to detect an effect modification because there were only 65 quitters and alcohol consumption was a binary variable [Froom et al, 1999]. The second study, a 2 year cohort, found a small but significant inverse association between alcohol consumption measured at study entry and subsequent weight gain in a group of women who quit or continued smoking during this time. This association was seen after adjustment for physical activity [Kawachi et al 1996]. There was no investigation of interaction by smoking status. Abstinence was measured by point prevalence which may have underestimated weight gain and accounted for the small effect size. The third study was the Lung Health Study which followed biochemically validated continuous abstainers for 5 years [Nides et al, 1994]. The data showed that for each standard US drink per week consumed at baseline, the regression coefficient was -0.098 ( $p=0.02$ ) in men and -0.234 ( $p=0.02$ ) in women. (Although the study team reported these coefficients separately for each gender, there is no statistically significant difference between them according to our calculations). Equating these to UK units gave regression coefficients of -0.083 and -0.132 for men and women respectively. The Lung Health Study also measured self reported alcohol consumption at baseline only and did not measure or adjust for physical activity or diet.

Thus there is consistent epidemiological evidence that alcohol consumption is associated with lower weight gain in people who stop smoking. We have been unable to find contrary evidence. We found no evidence that the association between alcohol consumption and weight gain depended upon gender despite epidemiological evidence in the general population suggesting that gender modifies the association between alcohol and weight gain. However it may be that the effect in quitting smokers is stronger than in the population as a whole and as such the gender differences become negligible.

Breslow, RA, Smothers, BA. (2005) Drinking Patterns and Body Mass Index in Never Smokers: National Health Interview Survey, 1997-2001. *American Journal of Epidemiology*; 161(4):368-376. doi: 10.1093/aje/kwi061

Colditz GA, Giovannucci E, Rimm EB, Stampfer MJ, Rosner B, Speizer FE et al. (1991) Alcohol intake in relation to diet and obesity in women and men. *American Journal of Clinical Nutrition*; 54(1):49-55.

Retrieved from <http://www.ajcn.org>

Cooke KM, Frost GW, Thornell IR (1982) Alcohol consumption and blood pressure. Survey of the relationship at a health-screening clinic. *Medical Journal Australia*; 1: 65-69

Froom P, Kristal-Boneh E, Melamed S, Gofer D, Benbassat J, Ribak J. (1999) Smoking cessation and body mass index of occupationally active men: the Israeli CORDIS Study. *American Journal of Public Health*; 89(5):718-722. Retrieved from <http://www.ajph.alphapublications.org>

Gordon T; Joseph T. Doyle JT (1986) Alcohol Consumption and Its Relationship to Smoking, Weight, Blood Pressure, and Blood Lipids. The Albany Study. *Archives of Internal Medicine*;146(2):262-265. Retrieved from <http://www.archinte.ama-assn.org>

Gordon T, Kannel WB. (1983) Drinking and Its Relation to Smoking, BP, Blood Lipids, and Uric Acid. The Framingham Study, *Archives of Internal Medicine*;143(7):1366-1374.

Hellerstedt WI, Jeffery RW, Murray DM. (1990) The Association Between Alcohol Intake And Adiposity In The General Population. *American Journal of Epidemiology*; 132(4):594-59a. Retrieved from <http://www.aje.oxfordjournals.org>

Kawachi I, Troisi RJ, Rotnitzky AG, Coakley EH, Colditz GA. (1996) Can physical activity minimize weight gain in women after smoking cessation? *American Journal of Public Health*; 86(7):999-1004. Retrieved from <http://www.ajph.alphapublications.org>

Mannisto S, Pietinen P, Haukka J, Ovaskainen ML, Albanes D, Virtamo J. (1996) Reported alcohol intake, diet and body mass intake in male smokers. *European journal of clinical nutrition*. 50 239-245. Retrieved from <http://www.nature.com/ejcn>

Nides M, Rand C, Dolce J, Murray R, O'Hara P, Voelker H et al. (1994) Weight gain as a function of smoking cessation and 2-mg nicotine gum use among middle-aged smokers with mild lung impairment in the first 2 years of the Lung Health Study. *Health Psychology*; 13(4):354-361. doi: [10.1037/0278-6133.13.4.354](https://doi.org/10.1037/0278-6133.13.4.354)

Tolstrup JS, Halkjaer J, Heitmann BL, Tjonneland AM, Overvad K, Sorensen TIA, Gronbaek MN. (2008) Alcohol drinking frequency in relation to changes in waist circumference. *American Journal Clinical Nutrition* 87(4) 957-962 Retrieved from <http://www.ajcn.org>

Tolstrup JS, Heitmann BL, Tjonneland AM, Overvad OK, Sorensen TIA, Gronbaek MN. (2005) The relation between drinking pattern and body mass index and waist and hip circumference. *International Journal of Obesity* 29: 490-497

Wang L, Lee IM, Nanson JE, Buring JE, Sesso HD, (2010) Alcohol consumption, weight gain, and risk of becoming overweight in middle-aged and older women. *Archives of Internal Medicine*; 170 (5): 453-461. Retrieved from <http://www.archinte.ama-assn.org>

Wannamethee SG and Shaper AG (2003) Alcohol, body weight, and weight gain in middle-aged men *American Journal of Clinical Nutrition* 2003;77:1312–7. 1–3 Retrieved from <http://www.ajcn.org>

Wannamethee SG, Field AE, Colditz GA, Rimm EB (2004) Alcohol Intake and 8-Year Weight Gain in Women: A Prospective Study *Obesity Research* Vol. 12 No. 9 1396 doi: 10.1038/oby.2004.175
