# Supplementary material
Source: PubMed Central journal article supplement (PMC3203131)
Supplement: supp_ntr092_Web_Appendix_3.pdf [file supp_ntr092_Web_Appendix_3.pdf]

### Web Appendix 3 – Table 2

**Table 2. Regression Analysis of weight change according to baseline BMI and alcohol consumption in quitters**

| Variable                        | Regression coefficient* | Lower 95%CI | Upper 95%CI | p value | r <sup>2</sup> |
|---------------------------------|-------------------------|-------------|-------------|---------|----------------|
| Constant                        | 7.886                   | 6.360       | 9.412       | <0.001  | 0.172          |
| BMI <sup>#</sup>                | 0.217                   | -0.175      | 0.609       | 0.274   |                |
| BMI <sup>2</sup> #              | 0.062                   | 0.006       | 0.118       | 0.030   |                |
| Alcohol units/week <sup>#</sup> | -0.161                  | -0.296      | -0.026      | 0.020   |                |

\*Stepwise adjustment, using p=0.2 cut-off for confounding variables of baseline height, BMI, Horne Russell Score, daily number of cigarettes, weekly units of alcohol at baseline, age in years, socio-economic status and ethnic origin.

# Re-centred around the total sample mean.
